# Supplementary material for: Influence of meteorological variability on interannual variations of springtime boundary layer ozone over Japan during 1981–2005
Source: Copernicus journal article supplement (doi:10.5194/acp-9-6287-2009), 2009-09-01
Supplement: Supplementary file 1 [file acp-9-6287-2009-supplement.pdf]

1 **Influence of meteorological variability on interannual**  
2 **variations of springtime boundary layer ozone over**  
3 **Japan during 1981–2005**

4  
5 **J. Kurokawa<sup>1</sup>, T. Ohara<sup>1</sup>, I. Uno<sup>2</sup>, M. Hayasaki<sup>3</sup>, and H. Tanimoto<sup>1</sup>**

6 [1]{National Institute for Environmental Studies, Onogawa, Tsukuba, Ibaraki, Japan}

7 [2]{Research Institute for Applied Mechanics, Kyushu University, Kasuga, Fukuoka,  
8 Japan}

9 [3]{Center for Environmental Remote Sensing, Chiba University, Yayoi, Inage, Chiba,  
10 Japan}

11 Correspondence to J. Kurokawa (kurokawa.junichi@nies.go.jp)

12  
13 **Supplementary Material**

14 **Relationships between springtime BL O<sub>3</sub> over western and central Japan**  
15 **and chemical processes**

16 In order to evaluate the influence of chemical processes on the IAV of O<sub>3</sub> over WCJ, we  
17 examined the chemical production (P(O<sub>3</sub>)), chemical loss (L(O<sub>3</sub>)), and net chemical  
18 production (N(O<sub>3</sub>)) of springtime BL O<sub>3</sub> simulated by E<sub>00</sub>M<sub>yy</sub>. P(O<sub>3</sub>), L(O<sub>3</sub>), and N(O<sub>3</sub>)  
19 are defined as follows:

20 
$$P(O_3) = (k_4[HO_2] + k_5[CH_3O_2] + k_6[RO_2])[NO] \quad (S1)$$

$$\begin{aligned}
21 \quad L(\text{O}_3) &= (k_1 k_2 [\text{H}_2\text{O}] / k_3 [\text{M}] + k_7 [\text{OH}] + k_8 [\text{HO}_2]) [\text{O}_3] \\
22 \quad &+ k_9 [\text{NO}] [\text{O}_3] (k_{11} [\text{NO}_2] [\text{OH}] [\text{M}] / (k_{10} [\text{NO}_2] + k_{11} [\text{NO}_2] [\text{OH}] [\text{M}])) \quad (\text{S2})
\end{aligned}$$

$$23 \quad N(\text{O}_3) = P(\text{O}_3) - L(\text{O}_3) \quad (\text{S3})$$

24 where  $k_i$  is the reaction rate coefficient for reaction  $K_i$ , listed in Table S1 and M denotes  
25  $\text{N}_2$  and  $\text{O}_2$ . By running CMAQ,  $P(\text{O}_3)$ ,  $L(\text{O}_3)$ , and  $N(\text{O}_3)$  were obtained every hour; then  
26 their springtime BL averages were calculated over East Asia during 1981–2005.

27 Figure S1 shows the composite anomaly fields of springtime BL  $P(\text{O}_3)$  (a and b),  $L(\text{O}_3)$   
28 (c and d), and  $N(\text{O}_3)$  (e and f) for high (a, c, and e) and low (b, d, and f)  $\text{O}_3$  over WCJ  
29 years. During high  $\text{O}_3$  over WCJ years, positive anomalies of  $P(\text{O}_3)$  were found around  
30 the Yangtze Delta and western Japan. On the other hand, large positive anomalies of  
31  $L(\text{O}_3)$  (i.e., larger chemical destruction compared to the average) were widespread from  
32 the eastern coast of China to south of Japan. This area is almost the same as the region  
33 showing positive  $\text{O}_3$  anomalies during high  $\text{O}_3$  over WCJ years (Fig. 6c). As a result,  
34 there were positive anomalies of  $N(\text{O}_3)$  over the southern part of WCJ and negative  
35 anomalies over the northern part. Relatively large positive  $N(\text{O}_3)$  anomalies appeared  
36 over the eastern part of CEC, but elsewhere anomalies were small or, over the northern  
37 part of CEC, negative. Over the Korean peninsula, anomalies were negative during high  
38  $\text{O}_3$  over WCJ years. On the other hand, during low  $\text{O}_3$  over WCJ years, anomalies of  
39  $P(\text{O}_3)$ ,  $L(\text{O}_3)$ , and  $N(\text{O}_3)$  showed a very similar horizontal distribution to those during  
40 high  $\text{O}_3$  over WCJ years but with opposite direction.  $N(\text{O}_3)$  anomalies around WCJ  
41 were positive in the north and negative in the south. Anomalies of  $N(\text{O}_3)$  showed large  
42 negative values over the eastern part of CEC, but elsewhere  $N(\text{O}_3)$  anomalies showed  
43 small negative or positive values. Although clear differences in chemical processes over

44 East Asia are apparent between high and low  $O_3$  over WCJ years, the effects of these  
45 processes on the IAV of  $O_3$  are not obvious. Figure S2 displays scatter plots and  
46 regression lines (a) between anomalies of springtime BL  $O_3$  and  $N(O_3)$  over WCJ and  
47 (b) between anomalies of springtime BL  $O_3$  over WCJ and  $N(O_3)$  over CEC. Anomalies  
48 of  $O_3$  and  $N(O_3)$  over WCJ are clearly not related. On the other hand, anomalies of  
49  $N(O_3)$  over CEC are positively correlated with those of  $O_3$  over WCJ. However, the  
50 slope of regression line is not large and the correlation coefficient is relatively small  
51 (0.37). These results suggest that the impact of chemical processes over East Asia on  
52 the IAV of  $O_3$  over WCJ is small.

53

54 Table S1. Reactions in O<sub>3</sub> photochemistry used to calculate P(O<sub>3</sub>), L(O<sub>3</sub>), and N(O<sub>3</sub>).

55

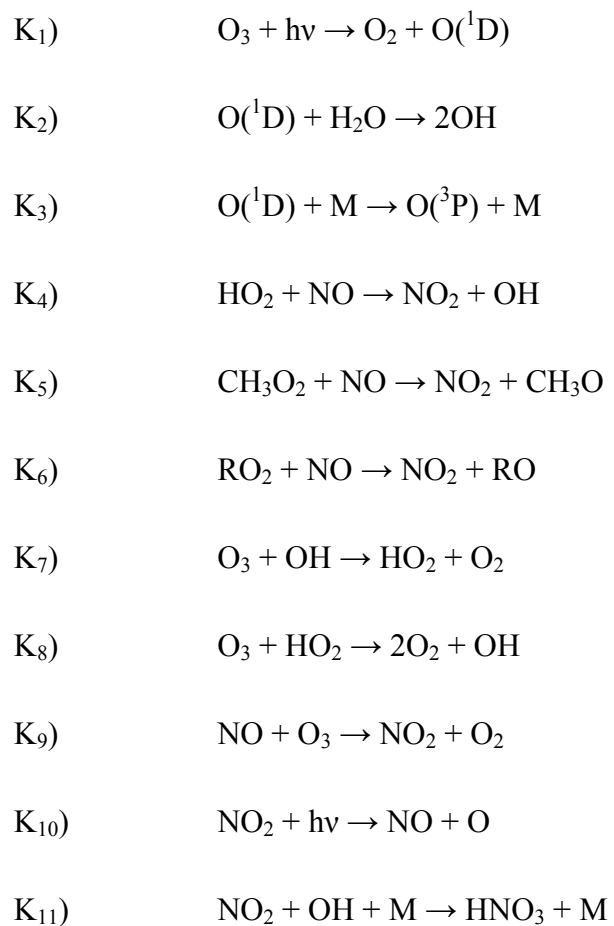

56

### Anomalies of chemical production ( $P(O_3)$ )

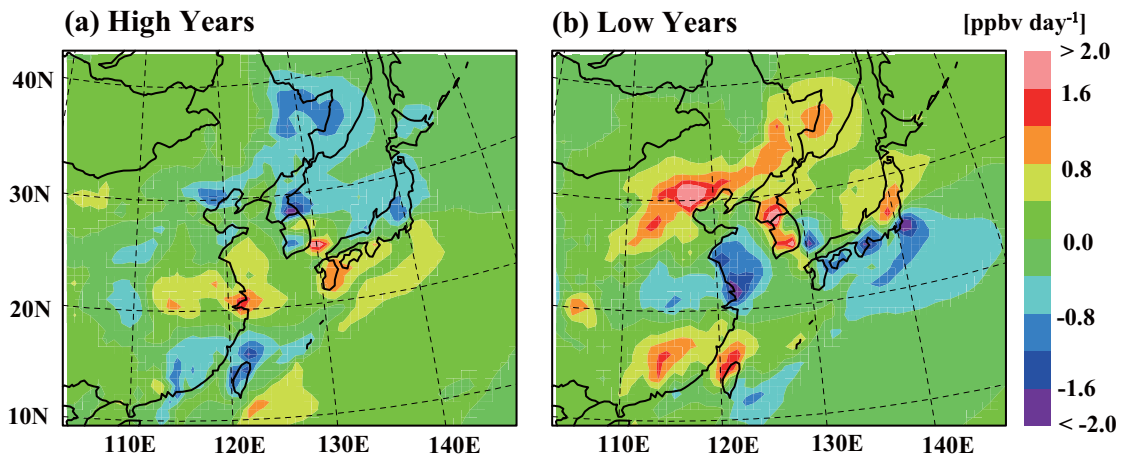

### Anomalies of chemical loss ( $L(O_3)$ )

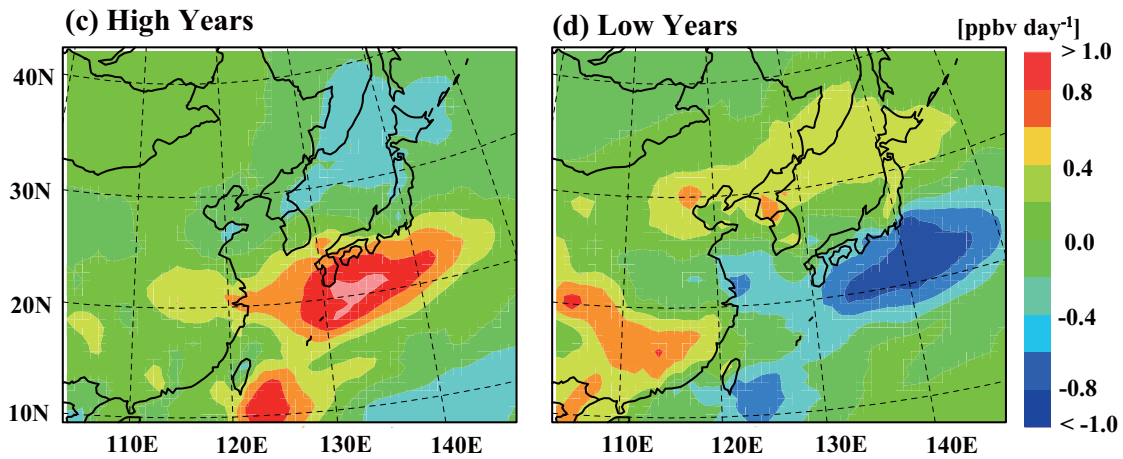

### Anomalies of net chemical production ( $N(O_3)$ )

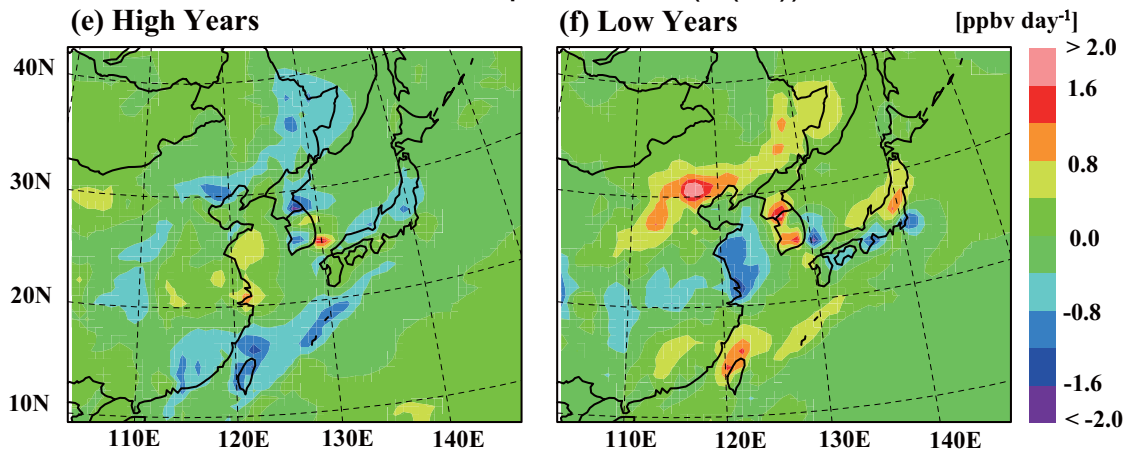

57

58

59 Figure S1. Composite spatial distributions of the anomalies of (a) chemical production  
60 ( $P(O_3)$ ), (c) chemical loss ( $L(O_3)$ ), and (e) net chemical production ( $N(O_3)$ ) during high  
61  $O_3$  over WCJ years (High Years). The same information but during low  $O_3$  over WCJ  
62 years (Low Years) is shown in (b), (d), and (f), respectively. High (low)  $O_3$  over WCJ  
63 years were defined as the top (bottom) 5 years among the springtime BL  $O_3$  anomalies  
64 over WCJ between 1981 and 2005. The  $E_{00}M_{yy}$  scenario was used for the model  
65 simulation. Anomalies are defined as deviations from the averaged values during  
66 1981–2005.

67

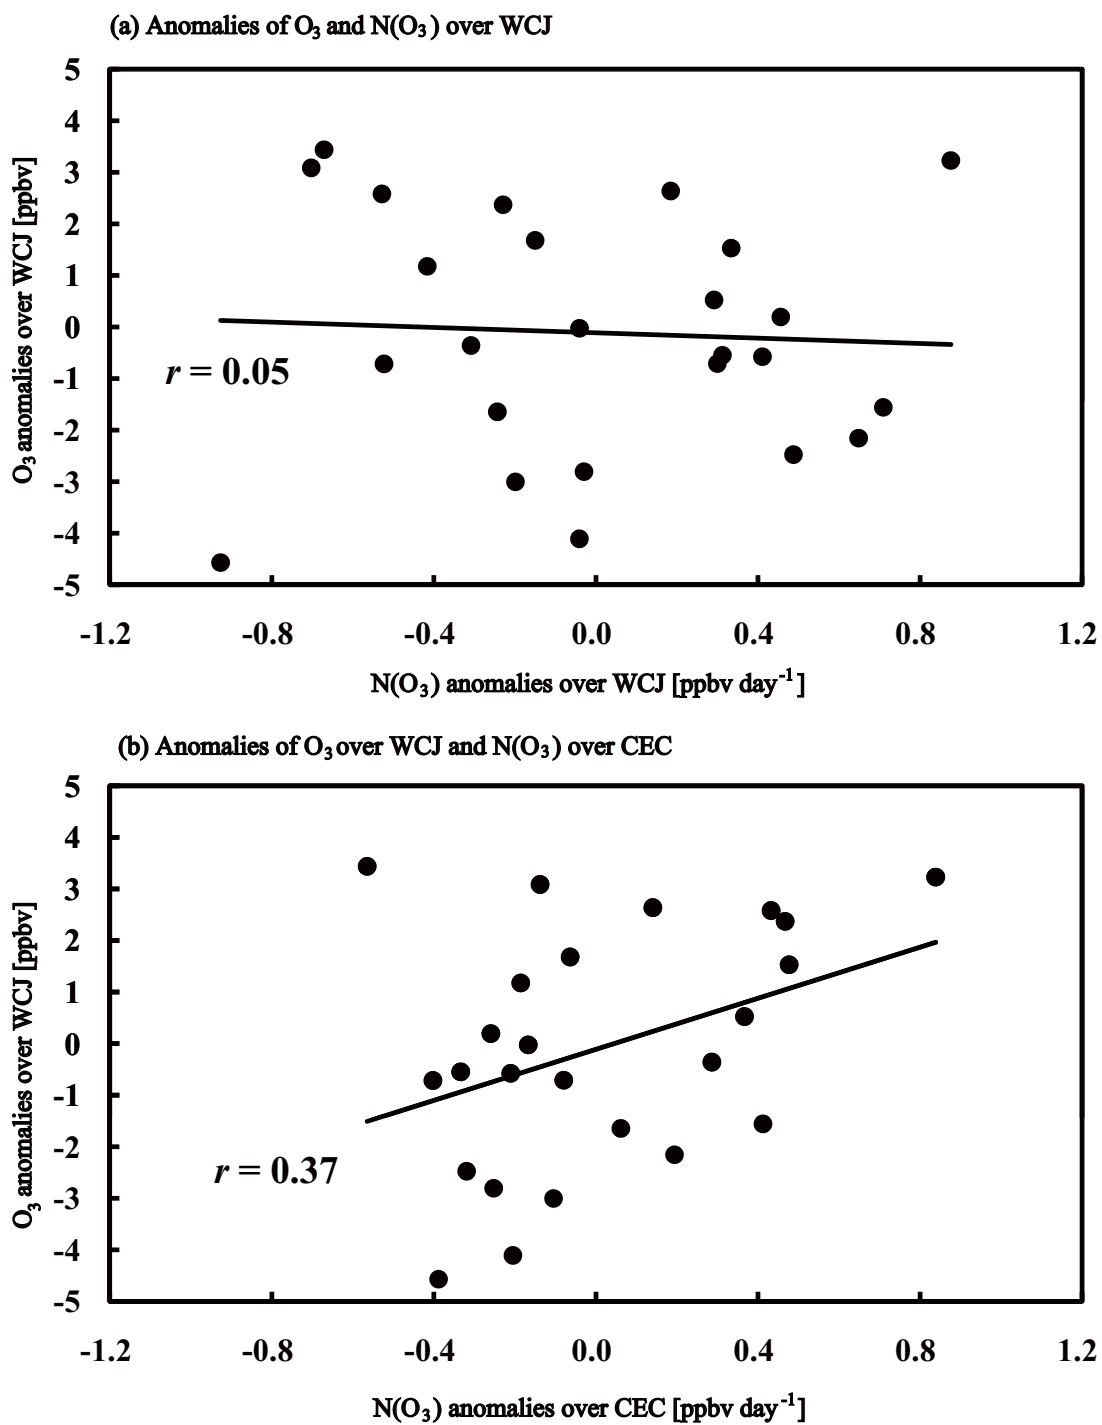

68

69 Figure S2. (a) Scatter plot and regression line between anomalies of springtime BL O<sub>3</sub>  
 70 and N(O<sub>3</sub>) over WCJ during 1981–2005. (b) The same as in (a) but between anomalies  
 71 of springtime BL O<sub>3</sub> over WCJ and N(O<sub>3</sub>) over CEC. The simulation scenario and the  
 72 definition of anomalies are the same as in Fig. S1.
